# Supplementary material for: The role of ZIP transporters and group F bZIP transcription factors in the Zn‐deficiency response of wheat (Triticum aestivum)
Source: PubMed Central journal article supplement (PMC5656842; doi:10.1111/tpj.13655), 2017-09-17
Supplement: TPJ-92-291-s002.pdf [file TPJ-92-291-s002.pdf]

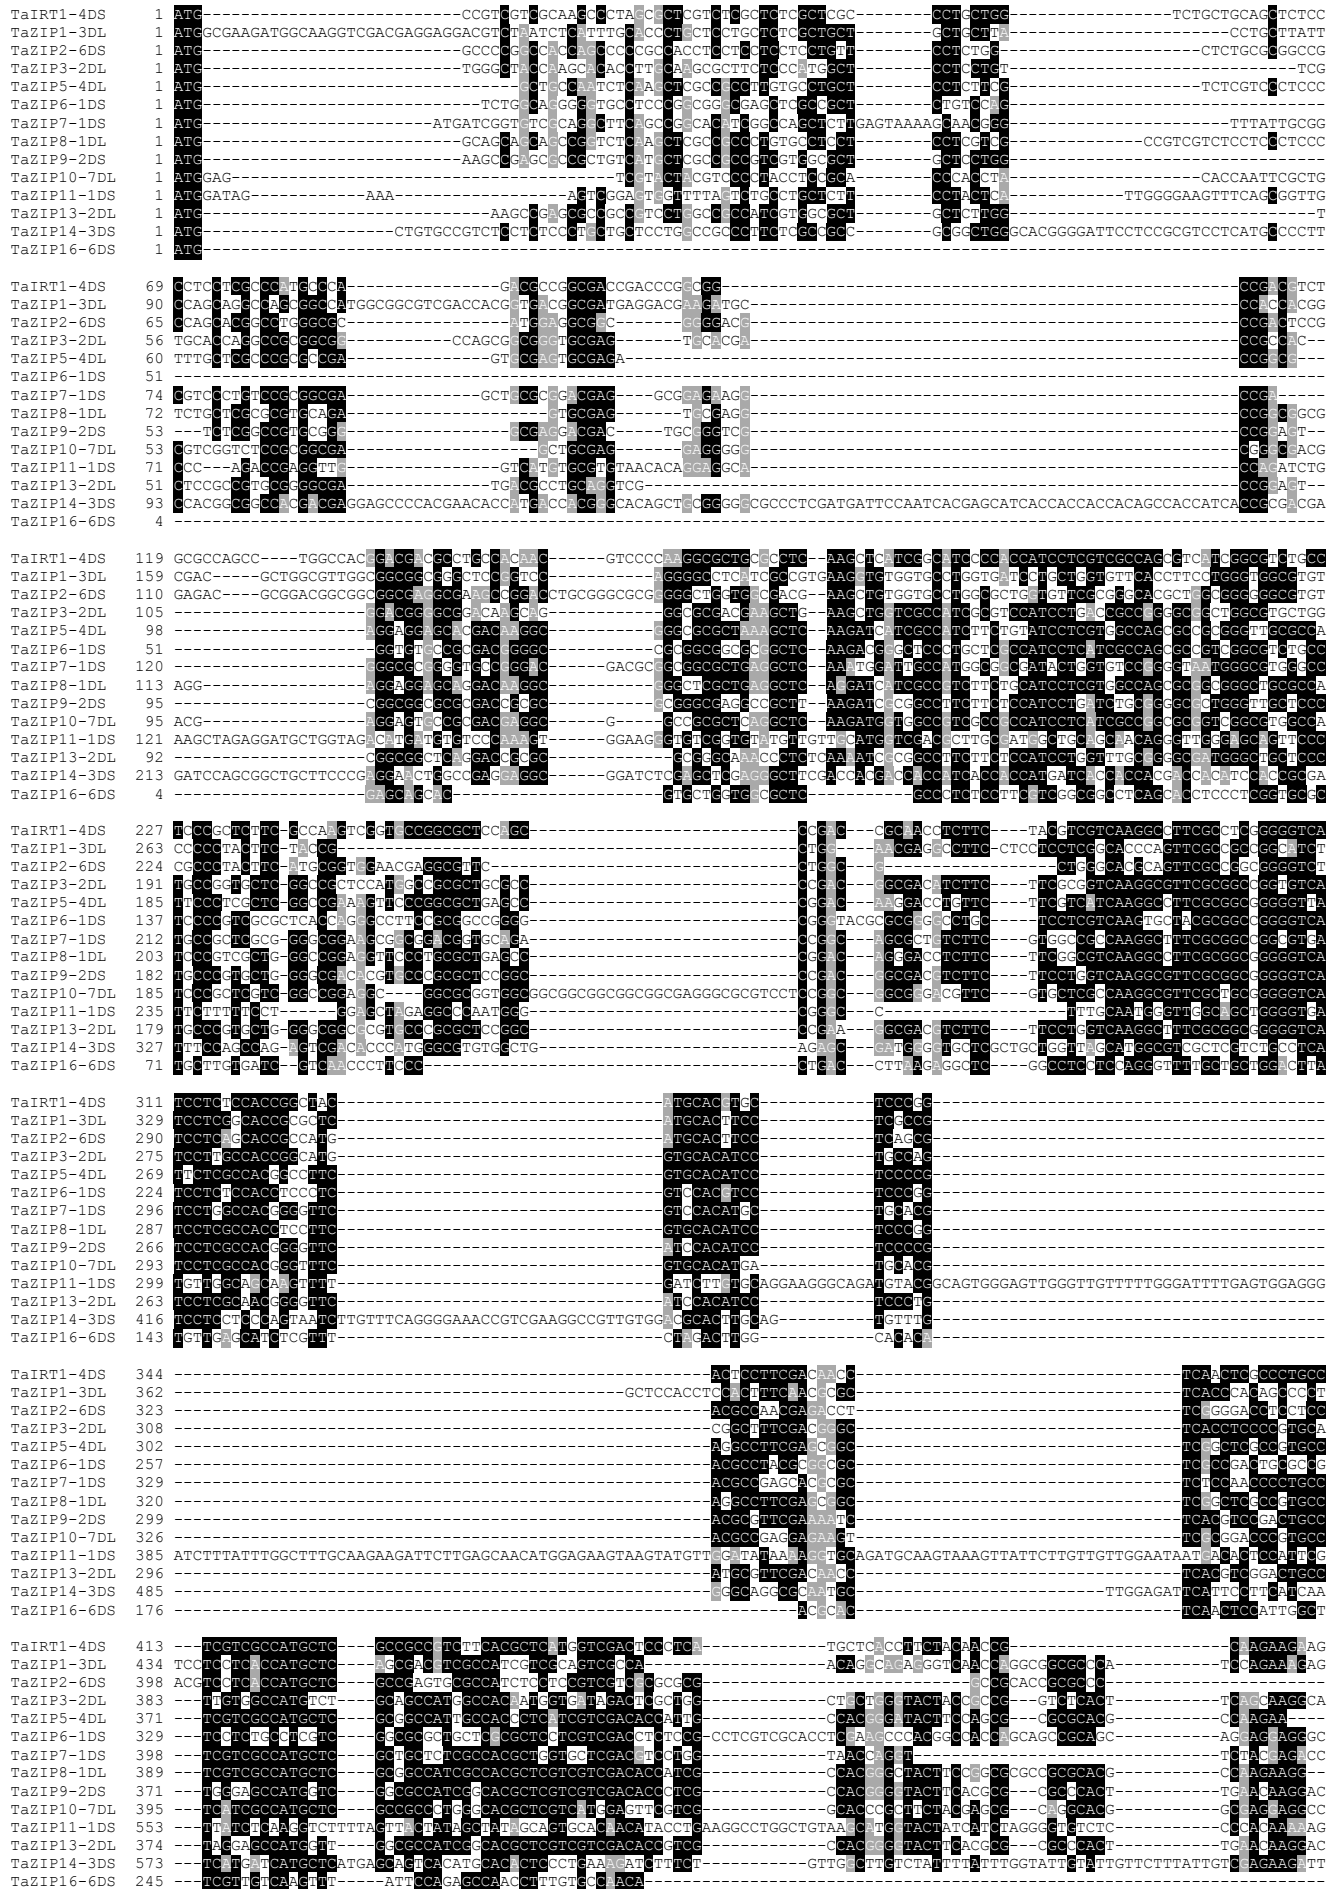

Figure S2. Multiple sequence alignment of TaZIPs. The Muscle algorithm (Edgar, 2004) was used for the alignment of sequences and the BoxShade software was used to generate this figure.
