# Supplementary material for: The role of ZIP transporters and group F bZIP transcription factors in the Zn‐deficiency response of wheat (Triticum aestivum)
Source: PubMed Central journal article supplement (PMC5656842; doi:10.1111/tpj.13655), 2017-09-17
Supplement: TPJ-92-291-s003.pdf [file TPJ-92-291-s003.pdf]

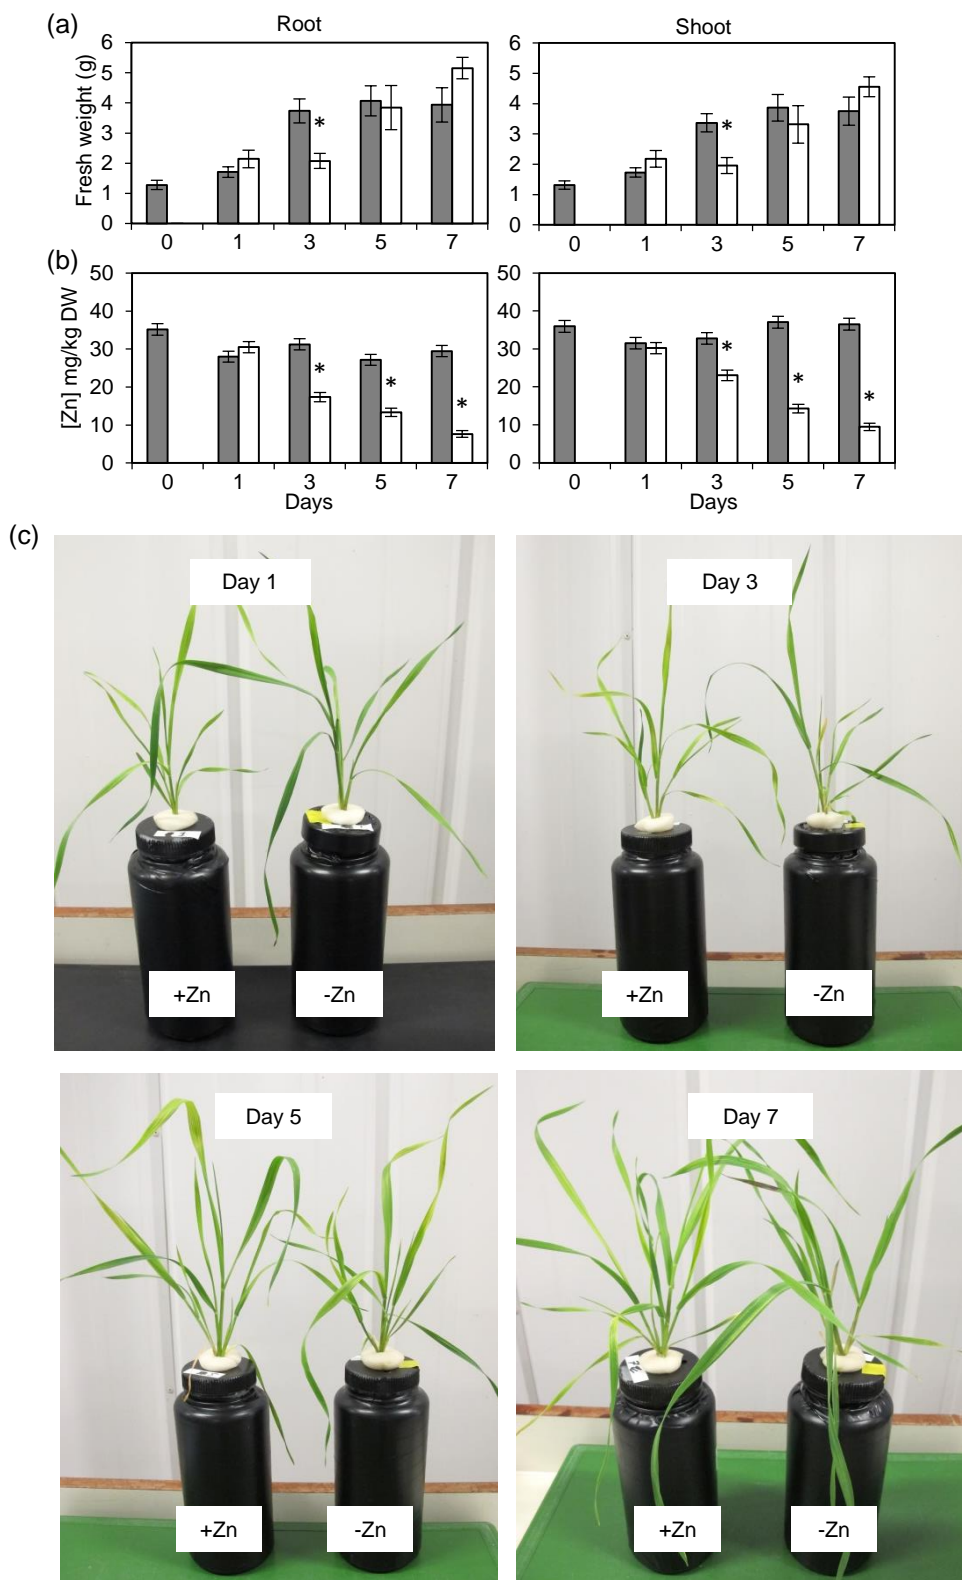

Figure S3. Phenotypic effect of Zn starvation throughout a three-week growth period. The effect of Zn starvation on fresh weight (a) and Zn concentration (b) of wheat roots and shoots. Results shown are means  $\pm$  S.E.M. ( $n=6$ ).  $* < 0.05$ , tested using Fisher's LSD on log-transformed data. +Zn = 8  $\mu$ M Zn (grey bars), -Zn = 0  $\mu$ M Zn (white bars). Plants were grown in +Zn culture solution for two weeks before treatment initiation, then sampled at days 0, 1, 3, 5 and 7 following -Zn treatment initiation. (c) No visible phenotypes were observed in shoot growth throughout the one-week starvation period. +Zn=8  $\mu$ M, -Zn=0  $\mu$ M.
