# Supplementary material for: The role of ZIP transporters and group F bZIP transcription factors in the Zn‐deficiency response of wheat (Triticum aestivum)
Source: PubMed Central journal article supplement (PMC5656842; doi:10.1111/tpj.13655), 2017-09-17
Supplement: TPJ-92-291-s004.pdf [file TPJ-92-291-s004.pdf]

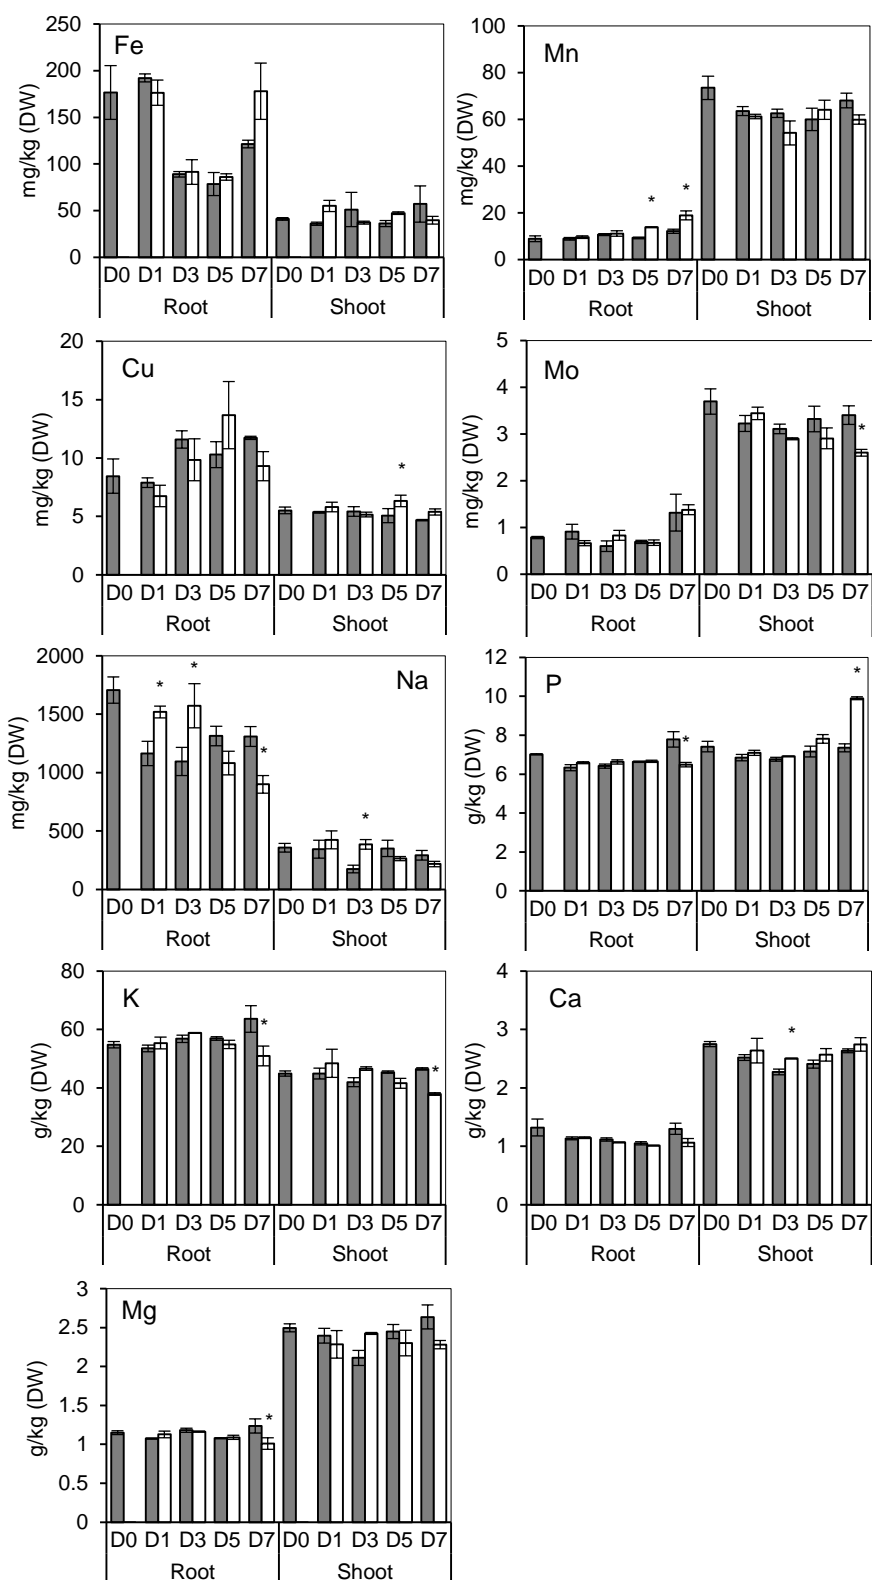

Figure S4. Mineral concentration analysis of wheat root and shoot samples during a one-week Zn-starvation period. Results shown are means  $\pm$  S.E.M. ( $n=3$ ).  $* < 0.05$ , tested using Fisher's LSD on log-transformed data. +Zn = 8  $\mu$ M Zn (grey bars), -Zn = 0  $\mu$ M Zn (white bars).
