# Supplementary material for: The role of ZIP transporters and group F bZIP transcription factors in the Zn‐deficiency response of wheat (Triticum aestivum)
Source: PubMed Central journal article supplement (PMC5656842; doi:10.1111/tpj.13655), 2017-09-17
Supplement: TPJ-92-291-s005.pdf [file TPJ-92-291-s005.pdf]

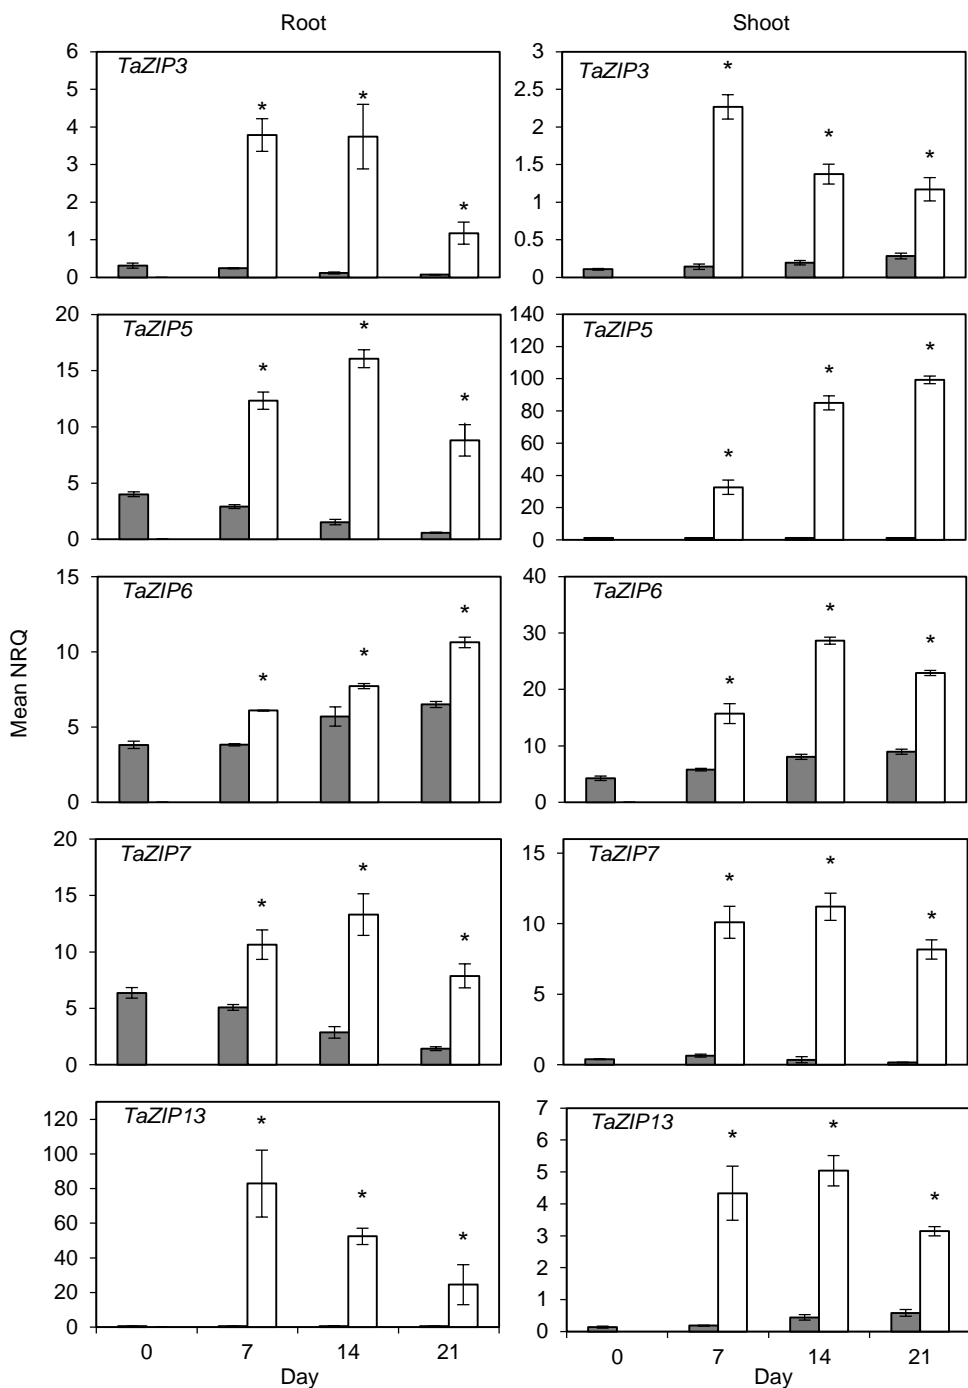

Figure S5. Gene expression analysis of *TaZIPs* in wheat root and shoot material throughout an extended Zn starvation period of three weeks. Relative expression levels (Normalized relative quantification (NRQ)) of five wheat *ZIP* transporter gene transcripts in root and shoot material throughout one week of Zn starvation. NRQ values are normalised to *TaActin3* expression, means of three biological replicates are given ( $\pm$  S.E.M.). Bars within individual graphs displaying an asterisk show significant difference between treatment means at a given time point. Significance ( $P < 0.05$ ) was tested post-hoc, using Fisher's LSD test on  $\text{Log}_2(1/\text{NRQ})$  transformed data. +Zn = 8  $\mu\text{M}$  Zn (grey bars), -Zn = 0  $\mu\text{M}$  Zn (white bars).
